# Supplementary material for: Light-Induced Dynamic Holography
Source: MDPI journal article supplement (doi:10.3390/mi13020297), 2022-02-14
Supplement: s1 [file s1]

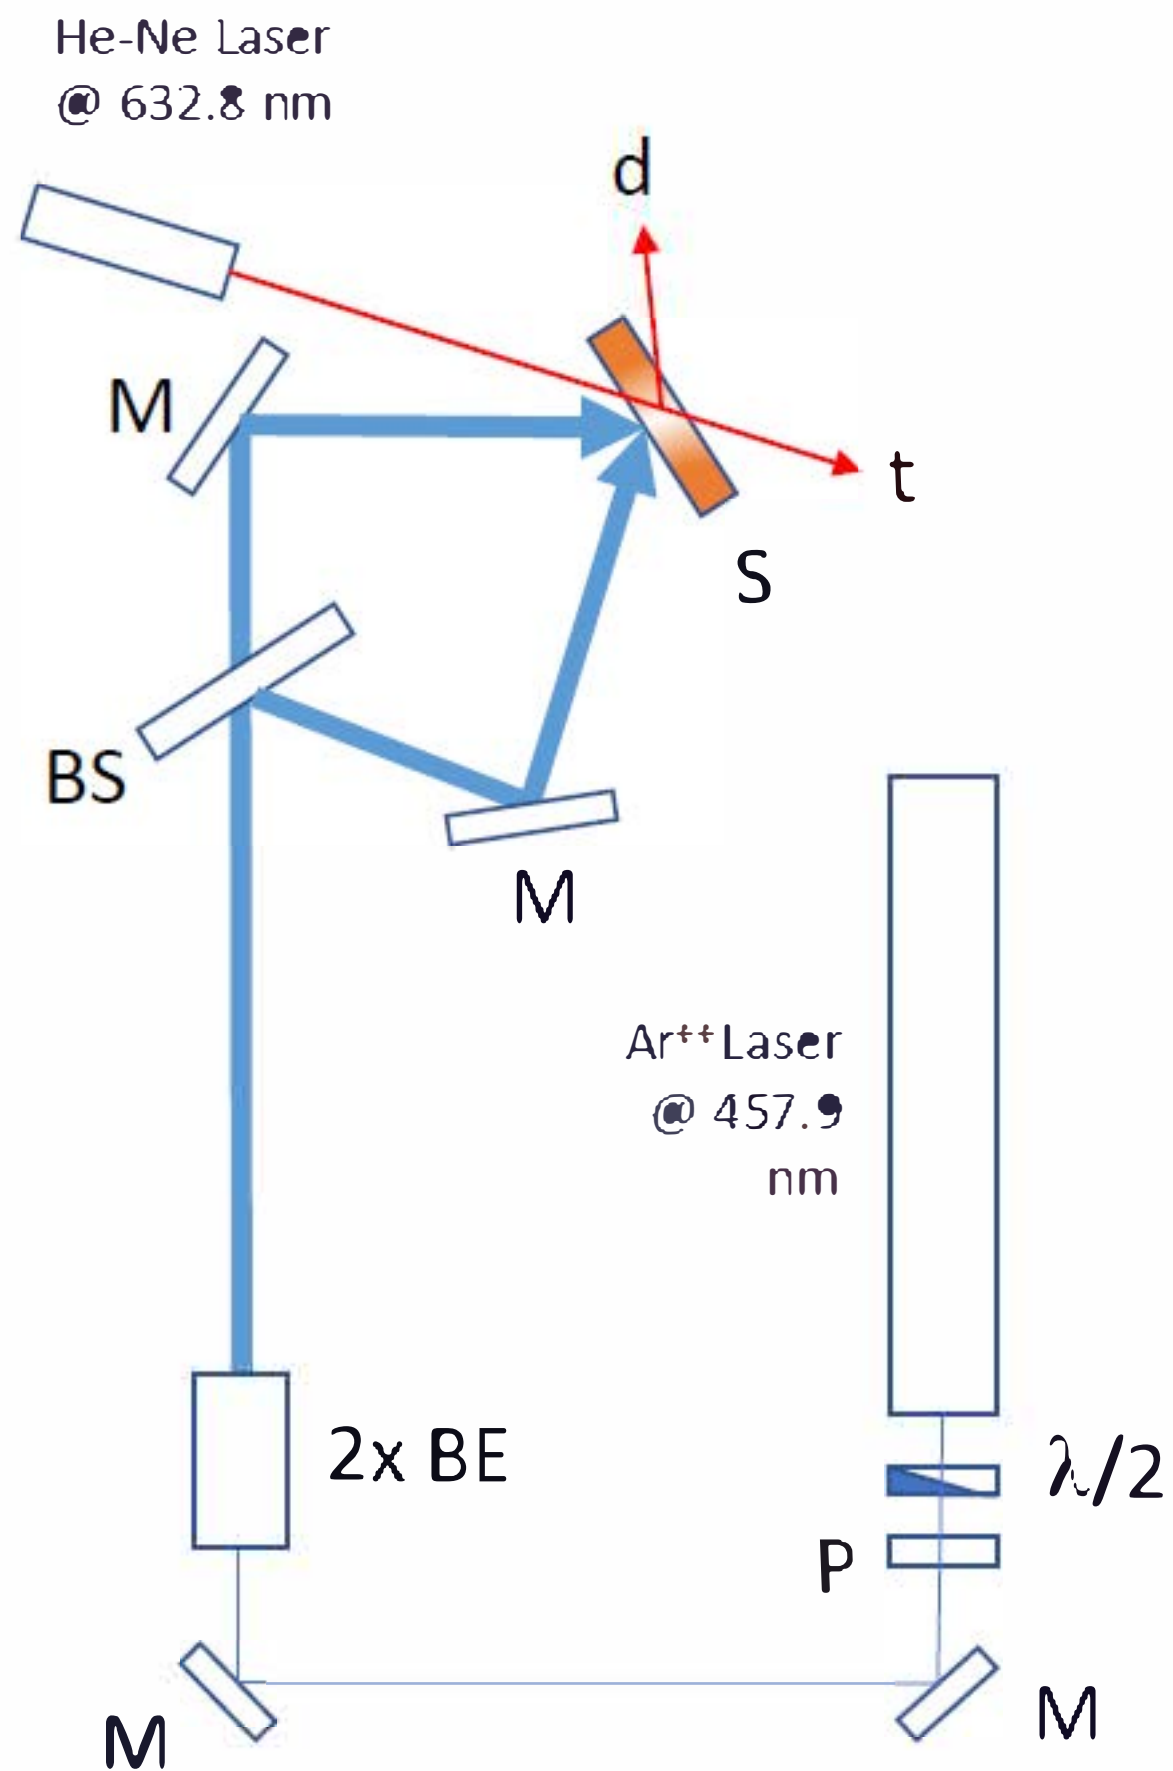

Setup (A)

$\lambda/2$ =half wavelength plate; P= polarizer; M=Mirror; 2x BE=2x Beam Expander; BS= Beam Splitter; S=sample; d and t= diffracted and transmitted beams respectively

Figure S1

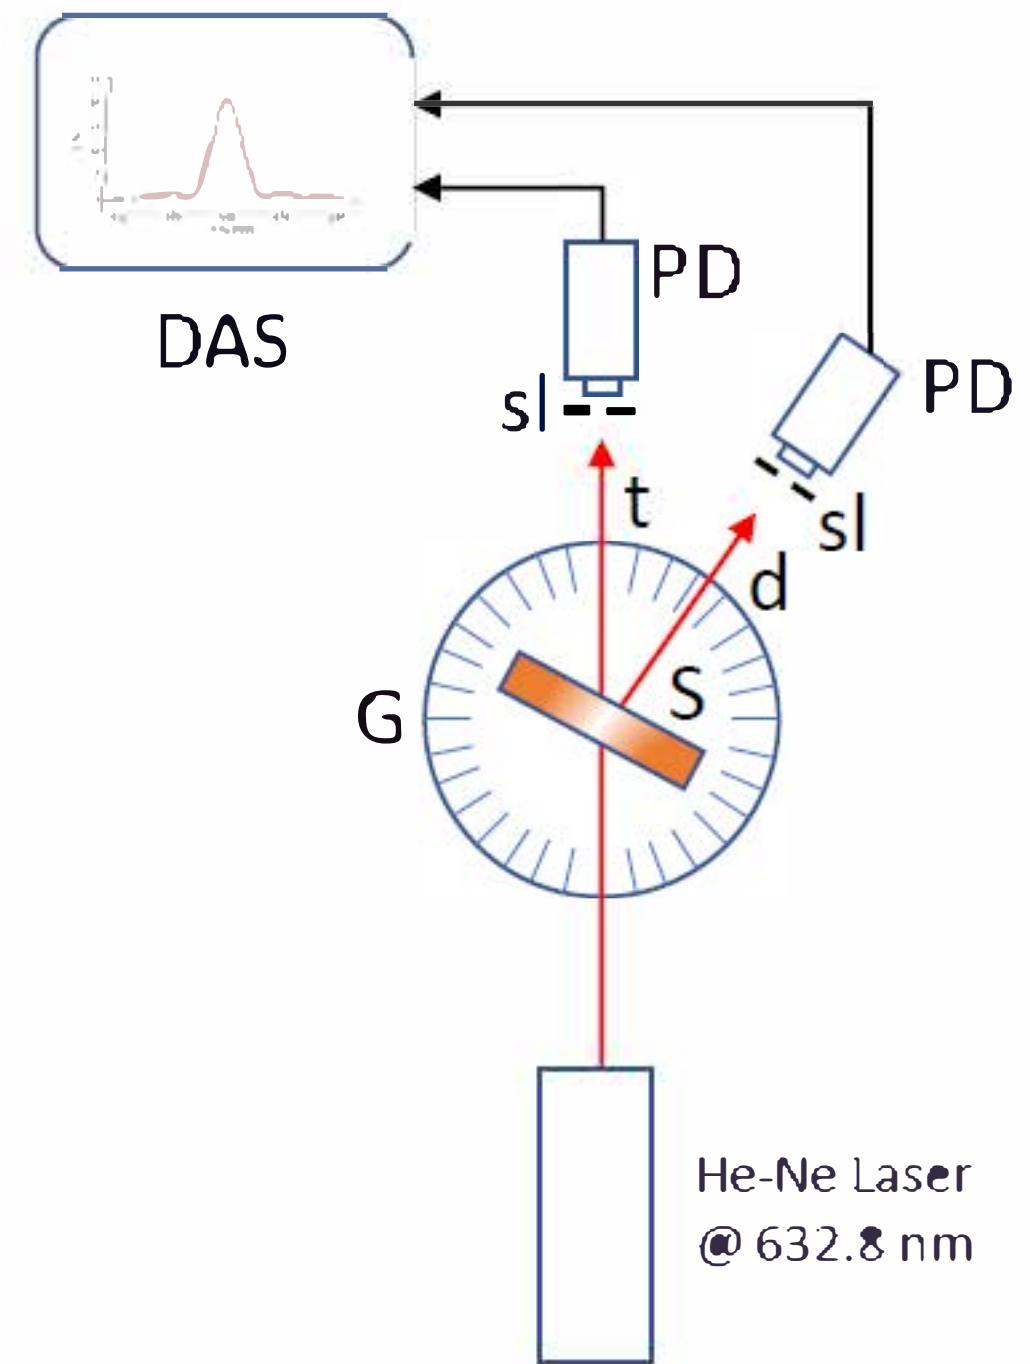

Setup (B)

G=Computer controlled Goniometer; S=sample; d and t= diffracted and transmitted beams; PD=Photo Detector; sl=slit; DAS=Data Acquisition System

Figure S2
